1 **Full Title:** Evaluation of a **Low-threshold Exercise And Protein**  
2 supplementation intervention for **Women (LEAP-W)** experiencing  
3 homelessness and addiction: Protocol for a single site intervention  
4 study.

5 **Short Title:** Protocol for a low threshold exercise intervention for  
6 women experiencing homelessness and addiction.

7

#### 8 **Authors**

9 Fiona Kennedy <sup>1\*</sup>, Deirdre Murray, <sup>2</sup>, Clíona Ní Cheallaigh <sup>3,4</sup>, Roman Romero-Ortuno <sup>5,6</sup>, Julie  
10 Broderick <sup>1</sup>.

11 <sup>1</sup>Discipline of Physiotherapy, School of Medicine, Trinity College Dublin, Dublin, D08W9RT,  
12 Ireland

13 <sup>2</sup>Academic Unit of Neurology, Trinity Biomedical Sciences Institute, Trinity College Dublin,  
14 Dublin, D02 R590, Ireland.

15 <sup>3</sup>Department of General Medicine and Infectious Diseases, St James's Hospital, Dublin,  
16 D08W9RT, Ireland.

17 School of Medicine, Trinity College Dublin, Dublin, D08W9RT, Ireland.

18 <sup>5</sup>Discipline of Medical Gerontology, School of Medicine, Trinity College Dublin, Dublin, D08  
19 NHY1, Ireland.

20 <sup>6</sup>Mercer's Institute for Successful Ageing, St James's Hospital, Dublin, D08 NHY1, Ireland.

21

**NOTE:** This preprint reports new research that has not been certified by peer review and should not be used to guide clinical practice.

22 \*Corresponding author

23 E-mail: [cromwelf@tcd.ie](mailto:cromwelf@tcd.ie) (FK)

24

25 FK and JB are Joint Senior Authors.

26 &R.RO, CNC and DM contributed equally to this work.

27

28

29

30

31

32

33

## 34 **Abstract**

35 **Background:** Frailty is a complex multi-dimensional state of increased vulnerability to  
36 adverse health outcomes and is usually associated with older age but there is growing  
37 evidence of accelerated ageing and frailty in non-geriatric populations, including those  
38 experiencing socio-economic deprivation and extreme social exclusion, such as people  
39 experiencing homelessness. Addiction, as a coping mechanism for prior trauma, is common  
40 among people who are homeless and can have a gendered dimension. Women experiencing  
41 homelessness and addiction have unique needs which require a gendered approach. The  
42 aim of this study is to explore the effectiveness of an exercise intervention to target the  
43 known physical functioning deficits and frailty which this population experiences.

44 **Methods:** This mixed-methods study will explore physical functioning deficits and frailty  
45 in women experiencing homelessness and addiction, using a bespoke test battery and an  
46 exercise intervention. Physical function (10m Walk Test, 2 Min Walk Test, Single Leg Stance,  
47 Chair Stand Test, hand grip dynamometry), frailty (Clinical Frailty Scale and the SHARE-  
48 Frailty Instrument) and nutritional status (Mini-Nutritional Status), pain (Numerical Pain  
49 Rating Scale) and quality of life (SF 12-V2) will be evaluated. The 10-week intervention will  
50 involve a 3-times weekly exercise programme with protein supplementation. Following this,  
51 qualitative interviews, which will be thematically analysed using Braun & Clarke  
52 methodology, will be conducted. This study will be conducted in Dublin from February to  
53 July 2024.

54 **Discussion:** Little is known about frailty-focussed interventions in women experiencing  
55 homelessness and addiction. This proposed study will help to increase the knowledge base  
56 regarding the physical health burden and frailty experienced by this extremely vulnerable  
57 population and will deliver a targeted intervention with a gendered dimension to mitigate  
58 its affects. The findings of this research will help narrow this research gap and will guide  
59 clinicians and policy makers to implement unique gender-based treatment strategies for this  
60 population. (299 words)

## 61 **Keywords**

62 Physical function, frailty, homelessness, addiction, women.

63

64 Clinical Trials.gov number: *NCT05700305*

## 65 **Introduction**

66 The world's population is ageing rapidly (1). Frailty, a sometimes-preventable consequence  
67 of a rapidly ageing population, is a complex state of cumulative decline across multiple  
68 physiological systems which renders a person vulnerable to adverse health outcomes and  
69 greatly challenges healthcare systems (2). Targeted interventions to manage frailty in older  
70 adults are recommended and exercise with nutritional supplementation has proven  
71 effectiveness in combatting and mitigating frailty (3, 4, 5).

72 Frailty as a construct is a geriatric concept which is strongly associated with increasing age  
73 (6). Notwithstanding that biological age is closely linked to frailty, it is known that  
74 chronological age alone will not identify frailty as the health and functional life status of  
75 populations are so variable (7). Growing evidence indicates the prevalence of premature  
76 ageing and frailty in non-geriatric populations (8, 9). 'Younger frailty' has been identified in  
77 populations of lower socioeconomic status, who live in areas of greater deprivation and  
78 experience an earlier onset of illness and disability (10, 11). In a study investigating people  
79 experiencing homelessness (PEH) admitted for inpatient care, 83% of participants had  
80 mobility problems and 70% were frail or pre-frail despite a low median age of 45 years (12,  
81 13). In an analysis of UK Biobank participants aged 37–73 years, 42% of individuals living  
82 with frailty were within the most socially deprived 20% of the cohort (10). Females are  
83 known to experience higher levels of frailty compared to males (14, 15). It is therefore not

84 surprising that poor physical functioning and frailty is experienced by young women who are  
85 homeless and use drugs (16, 17).

86 Health services for PEH frequently focus on crisis-based medical, nursing and addiction  
87 services, often with a gender-blind lens (18, 19). High levels of stigma, shame and fear result  
88 in women accessing services even less and seeking help at breaking point with complex  
89 coinciding physical and mental health needs (20, 21). Homelessness and substance use in  
90 women is inter-sectoral and may overlap with trauma, abuse, domestic and sexual violence  
91 and exploitation, and the needs of these women are complex and unique (22). Pathways  
92 into homelessness are frequently different to that of men and require a different approach  
93 (23). Internationally, gender-based services for women who are experiencing homelessness  
94 and addiction are lacking and services are mostly delivered in mixed gender settings (18,  
95 20). Women-specific services are recommended to increase safety, stability, wellbeing, and  
96 psychosocial functioning to respond meaningfully to the serious health and social care  
97 needs of women in this setting (24). Gender specific and gender sensitive research is  
98 required to fill this knowledge gap (25).

99 Our prior research, the LEAP I study demonstrated high retention (83% female v 42% males)  
100 with excellent engagement and feedback from its female participants, yet caution was  
101 observed around engaging in a mixed exercised programme with men (26). Women have  
102 traditionally been underserved in research and policy, yet multiple sources cite women as  
103 the fastest growing homeless demographic (23). No study has examined how targeted

104 women-only exercise programmes with nutritional supplementation work in practice in this  
105 population.

106 The overall aim of this study is to explore physical functioning and frailty outcomes of an  
107 exercise intervention with protein supplementation in a group of (non-geriatric) women  
108 experiencing homelessness and addiction challenges. The objectives are:

109 1. To evaluate recruitment, retention and adherence rates, and any adverse effects of the  
110 intervention.

111 2. To evaluate pre- and post-intervention levels of physical function, nutritional and frailty  
112 status, pain, and general health status.

113 3. To evaluate programme feedback and gain deeper insights into participants perspectives  
114 and experiences of the exercise intervention.

115

## 116 **Materials and Methods**

### 117 **Study design, setting and time frame.**

118 This mixed-methods study will involve a single-arm intervention which will take  
119 place in Jane's Place, Merchants Quay Ireland (MQI), in Dublin city centre, a day-  
120 service centre which provides services for women who are homeless and/or in  
121 addiction. Following the intervention qualitative research in the form of individual  
122 exit interviews will be conducted with 20 participants or up to the point of data

123 saturation. This study has received ethical approval from the Faculty of Health  
124 Sciences, Trinity College Dublin (Ethical Approval Reference Number: 211202).

125

## 126 **Study population, eligibility criteria and recruitment strategy**

### 127 **Study population**

128 This study will involve a non-geriatric population of women who attend Jane's  
129 Place in Dublin city centre. These women have complex needs, many experiencing  
130 homelessness and addiction challenges.

### 131 **Eligibility criteria**

132 Inclusion criteria:

133 ➤ Adult women (18-65 years) accessing services in Jane's Place who consent to  
134 participation.

135 Exclusion criteria:

136 ➤ Any person not meeting the age eligibility criteria.

137 ➤ Any person identifying as a male.

138 ➤ Any person lacking capacity to give consent.

139 ➤ Any person with major physical/medical or cognitive challenges which would  
140 preclude ability to safely complete the assessment or

141 ➤ Any person with insufficient English language ability to give fully informed  
142 consent.



143       ➤ Women with a confirmed pregnancy.

## 144   **Recruitment Strategy**

145   All potential participants will be provided with a participant information leaflet  
146   (PIL) detailing the purpose of the data collection, potential risks and benefits and  
147   data protection rights. Where possible a seven-day gap, between receipt of the PIL  
148   and obtaining consent, will be provided to allow people time to consider  
149   participation. However, if it is their preference to be seen at an earlier and more  
150   convenient time this will be facilitated due to the innocuous nature of the  
151   evaluation.

152   Once the research physiotherapist is satisfied that the participant has read and  
153   fully understands the PIL, they will proceed to obtain written informed consent.

154   Obtaining consent will take place at the first face to face interaction with the  
155   participant prior to commencement of the assessment. The written consent  
156   informs participants that they are permitted to withdraw from the study at any  
157   time. They will be provided with their own copy of this consent form and PIL with  
158   their own signature and that of the research physiotherapist.

159

## 160   **Stakeholder engagement**

161   Recommendations from the linked LEAP II trial (16) included health education and  
162   awareness workshops preceding exercise interventions to enhance health literacy,

163 target lifestyle behavioural change and improve retention rates. Prior to the LEAP-  
164 W programme, a number of exercise workshops will be delivered for staff and  
165 service users in Jane’s Place. Feedback from this stakeholder engagement will  
166 inform the design of the intervention.

167

## 168 **Evaluation and test battery**

169 Using a bespoke data collection form, the following demographic data will be collected:  
170 age, gender, ethnicity, living arrangement and environment, highest level of education,  
171 marital status, employment status, history of incarceration, history of addiction, self-  
172 reported health, and medical history. Physical function, frailty and other related  
173 variables will be evaluated using the test battery outlined in Table 1.

174 **Table 1. Test Battery.**

| <b>Construct Measured</b>          | <b>Test</b>                                                      |
|------------------------------------|------------------------------------------------------------------|
| Sarcopenia and upper limb strength | Upper/Lower Limb circumference<br>Hand grip dynamometry (27, 28) |
| Lower limb strength and endurance  | 30-sec Chair Stand Test (29)                                     |
| Endurance                          | 2-minute walk test (30)                                          |
| Speed                              | 10m walk test (31)                                               |
| Balance                            | Single leg stance (32)                                           |

|                               |                                           |
|-------------------------------|-------------------------------------------|
| Frailty                       | SHARE-FI (33), Clinical Frailty Scale (6) |
| Pain                          | Numerical Pain Rating Scale (34)          |
| Health status/Quality of Life | Short Form 12 (35)                        |
| Nutritional Status            | Mini-Nutritional Assessment (36, 37)      |

175

176 **1. Strength and muscular mass:** Muscle strength will be measured, using  
177 a Jamar Digital Hand Dynamometer, while sitting with the elbow flexed at 90°,  
178 the forearm mid-prone, the wrist in neutral and the hand unsupported (27,  
179 28). Results will be compared to normative reference values (38). Two  
180 measurements will be recorded and also used for the SHARE-Frailty  
181 Instrument (FI) assessment (33).

182 Mid-calf circumference girth will be evaluated as this measure correlates with  
183 appendicular muscular mass (39). This will be measured using a flexible tape  
184 measure at the level of the largest circumference of the calf. Measurements  
185 will be compared to gendered cut-off values (40). Mid-arm muscle  
186 circumference reflects both muscle mass and caloric and protein adequacy  
187 and may be used to signify wasting or malnutrition (41). This test has been  
188 recommended in situations where lower limb swelling is present (42). The

189 maximum upper arm muscular mass will be measured using a flexible tape  
190 measure. Results will be compared to global reference values (43).

## 191 **2. Physical performance and lower extremity physical function:**

192 This will be measured using the following physical performance measures:

193 (i) The 10m Walk Test (10mWT). This test measures gait speed and functional  
194 mobility and is recorded in m/s. Gait speed is calculated as total distance/time  
195 (31).

196 (ii) The 2 Minute Walk Test (2MWT). This test of self-paced walking ability and  
197 functional capacity assesses a participants' ability to walk unaided over a 15m  
198 distance, as fast as possible, for two minutes. Rest breaks are permitted, and  
199 the distance covered is measured (30).

200 (iii) The Chair Stand Test (CST). This tests lower limb strength and endurance  
201 and records the total number of sit to stand repetitions performed in 30  
202 seconds (29).

203 (iv) The Single Leg Stance Test (SLST). This balance test is performed on each  
204 leg. The participant is timed standing unassisted on one leg, with eyes open  
205 and hands placed on the hips (32).

206 **3. Pain:** Each participant will be asked if they are experiencing pain and will  
207 be questioned about its location and duration. Pain severity will be assessed

208 using the Numerical Rating Scale (NRS) (34). The NRS is a unidimensional  
209 measure of pain intensity from 0-10, with 0 being zero pain and 10 the worst  
210 pain imaginable.

211 **4. Frailty:** Frailty will be assessed using the Clinical Frailty Scale (CFS) (6) and the SHARE-  
212 Frailty Instrument (FI) (33). The CFS is validated for people over 65 years. It is assessed by  
213 the tester. Each point on the scale correlates with a level of frailty and a visual chart aids  
214 classification from 1 (very fit) to 9 (terminally ill). Higher scores indicate higher levels of  
215 frailty. The SHARE-FI is validated for people over 50 years (33). It consists of four brief  
216 questions related to the following variables: exhaustion, loss of appetite, walking difficulties  
217 and low physical activity, and grip strength measurement. The five results are entered into a  
218 freely available web calculator to generate a frailty score and a frailty category of non-frail,  
219 pre-frail and frail is also generated. A minor modification was made to the terminology of  
220 the SHARE-FI to reflect the real-world experiences of this population.

221 **5. Nutritional status** will be assessed using the Mini-nutritional  
222 assessment (MNA) which assesses the risk of malnutrition (36). The short  
223 form of the MNA (MNA-SF) (37) is an efficient screening tool consisting of six  
224 questions on food intake, weight loss, mobility, psychological stress, or acute  
225 disease, the presence of dementia or depression, and body mass index (BMI).  
226 The maximum score for this part is equal to 14. A score of 12 or higher  
227 indicates a normal nutritional status thus excluding malnutrition and/or

228 malnutrition risk. A score of 11 or less indicates the requirement to proceed  
229 with the complete version of the MNA (MNA-LF) (37). The terminology of two  
230 of the questions of the MNA (regarding acuity of illness and psychological  
231 stress) were slightly modified for the purposes of evaluation of this population  
232 in this setting.

233 **8. Short-Form 12 (SF-12)** The SF-12 V2 is a self-report measure of health  
234 used across age, disease, and treatment groups (35). It uses eight domains  
235 including physical and social activities, pain, mental health, emotional health,  
236 vitality and general health perceptions to measure health. The tester will read  
237 and complete the 12-question survey with the participant. Results will be  
238 entered into a software program provided by the licensing company  
239 QualityMetric and two summary scores, mental health (MCS12) and physical  
240 health (PCS12) will be generated.

241 The assessor will document any issues with terminology of the outcome  
242 measures utilised, difficulties with completion or floor or ceiling effects  
243 reached, as these instruments were designed with geriatric populations in  
244 mind.

## 245 **Intervention**

246 This intervention study will be conducted for 10 weeks. It will involve a low threshold,  
247 three-times weekly exercise intervention (two exercise classes with protein

248 supplementation and an outdoor 'Park Walk'). The intervention will be delivered by two  
249 research physiotherapists who will adhere to all safety procedures. Flexibility will be  
250 facilitated with the provision of a four-week window for pre-intervention evaluations  
251 prior to commencement of the programme. Using a trauma-informed lens (20) flexibly  
252 arranged group or one-to one sessions will be delivered based on participant preference.  
253 Exercise programming strategies and variables are based on our earlier work (LEAP I and  
254 LEAP II trials) (16, 17) and also informed by prior stakeholder involvement from people  
255 with lived experience. The exercise classes will be multi-modal, with a primary focus on  
256 strength and based on core set of resistance exercises (Table 2). Aerobic, balance and  
257 flexibility work will be integrated into the class and the exercises will be individualised  
258 based on initial assessment results and presentation of participants. Using a gender-  
259 based perspective, the following considerations and adaptations will be built into the class;  
260 (i) core-stability exercises to target pelvic floor and/or abdominal muscle weakness, (ii)  
261 bone building exercises to target peri-and postmenopausal bone loss and (iii) age-  
262 associated muscle mass loss. Music, dance and fun orientated physical activity games, an  
263 important feature of aforementioned linked studies, will be incorporated to optimize  
264 enjoyment and self-esteem. Borg's Rate of Perceived Exertion Scale will be used to  
265 monitor effort and scale the intensity of the workout (44). To promote post-exercise  
266 muscle protein synthesis, a nutritional supplement (200ml pre-prepared 'protein shake',  
267 Fresubin) which consists of 20g of protein will be offered immediately post exercise. The  
268 'Park Walk' will focus on the aerobic component of the intervention, using open green

269 space to maximise physical and mental health outcomes. It will be a flexibly arranged  
270 20–30-minute self-paced group or one-to-one walk. To build sustainability beyond the  
271 ten-week programme brief health promoting and physical activity educational  
272 interventions will be included in the exercise class setting to empower people to engage  
273 in unsupervised exercise following the study.

274

275 **Table 2. Exercise Circuit.**

| <b>Core exercise</b>           | <b>Initial Intensity</b> | <b>Progression/Adaptations*</b>                                                              |
|--------------------------------|--------------------------|----------------------------------------------------------------------------------------------|
| Sit to stand/squats/lunges     | 2 sets 10-15 reps        | 3 sets of 15 reps<br>use of weights/ball                                                     |
| Elbow Bends                    | 2 sets 10-15 reps        | 3 sets of 15 reps<br>use of weights/theraband                                                |
| Step-ups                       | 2 sets 10-15 reps        | 3 sets of 15 reps<br>Vary height of step; use of weights                                     |
| Arm elevations or boxing       | 2 sets 10-15 reps        | 3 sets of 15 reps<br>use of weights or boxing gloves/pads                                    |
| 'Penguin waddle'-hip abduction | 2 sets 10-15 reps        | 3 sets of 15 reps<br>additional upper limb abduction and elevation; movement with 360° turns |
| Scapular retractions           | 2 sets 10-15 reps        | 3 sets of 15 reps<br>Weights/theraband                                                       |



|                  |        |                                                                               |
|------------------|--------|-------------------------------------------------------------------------------|
| Aerobic activity | 5 mins | Exercise bike, ladders, hurdles, skipping ropes, end of session fun activity. |
| Core set         | 5 mins | Pelvic floor exercises; pelvic tilts, bridging, all 4's set                   |

276 Adaptations: exercises individualised and progressed for each participant by research physiotherapist

277 Progression: 2-3 sets of 10-15 repetitions completed at each session; beyond that, low resistance weights

278 (1.1kg-4.5kg), theraband or increased step height introduced to achieve a strengthening effect.

279

## 280 **Qualitative data**

281 Following the intervention one-to-one in-person exit interviews will be conducted to

282 enable participants to share their feedback and express their views, in order to enhance

283 the understanding of behaviours, adherence and retention challenges and to provide

284 insights for future programmes in this area (45) (S3 Fig). Interviews will continue until 20

285 participants are seen or until data saturation is reached. The interviews will be audio-

286 recorded and transcribed verbatim and member checking will be utilised.

287

## 288 **Sample size**

289 As this is a novel field of research, sample size calculations are challenging. The sample

290 method used will be non-probability, convenience sampling, involving the recruitment of a

291 tailored sample that is in proportion to characteristics of the population of interest. This

292 approach may limit generalisability of results but will minimise selection bias (46). A sample  
293 size of 30 or greater has been proposed for feasibility studies (47). Considering this and the  
294 aim and objectives of this study a target of 40-50 participants has been selected, to allow for  
295 drop-out rate of approximately 30%.

## 296 **Data collection and management**

### 297 **Analytic plan**

298 All data will be pseudonymised at point of entry into excel spreadsheets and then  
299 transferred into IBM SPSS V28 for analysis. For quantitative data, nominal or ordinal  
300 variables will be reported as frequencies and percentages. Continuous variables will be  
301 summarised as mean and standard deviation if normally distributed and median and inter-  
302 quartile range if non-normally distributed. Data will be tested for normality using the  
303 Kolmogorov–Smirnov/Shapiro Wilk test and will be compared across timepoints using the  
304 general linear model procedure (normally distributed data) and the Friedman’s test (non-  
305 normally distributed data). Chi-squared t-tests will be used where appropriate and some  
306 data may be categorised to investigate relationships between variables. Exploratory  
307 regression models will be developed to explore correlates and predictors of frailty and poor  
308 physical functioning. A  $p$ -value of  $<0.05$  will be considered significant. For the qualitative  
309 data, Braun and Clarke thematic analysis methodology will be employed to provide an in-  
310 depth analysis of the exit interview data (48).

## 311 **Discussion**

312 Poor physical functioning and frailty has been demonstrated in younger populations who  
313 suffer from health disparities and an extreme form of social exclusion, such as PEH and  
314 addiction challenges (12, 13, 49). Women who experience homelessness and addiction are  
315 especially vulnerable and have unique and complex needs which require a targeted and  
316 gender-sensitive approach. Little is known about frailty-focussed interventions in this  
317 population, who are often excluded from research and services (18). However, this  
318 population have engaged well in two previous linked studies (LEAP I and II). This study aims  
319 to address the research gap by providing a targeted exercise intervention to women  
320 experiencing homelessness and addiction challenges, thereby providing a gendered  
321 dimension, with gendered sensitivity. Its findings will guide clinicians and policy makers in  
322 implementing targeted interventions to assist in improving health outcomes in societies  
323 most marginalised and vulnerable groups.

324

## 325 **Study status**

326 Recruitment and data collection will commence in February 2024 and will be completed by  
327 July 2024.

## 328 **Funding**

329 This has been funded by Trinity College Dublin and the Irish Research Council.

## 330 **Dissemination plans**

331 Conference presentations and publications in peer-reviewed journals will be one method of  
332 dissemination. These will be done following the data analysis.

## 333 **Acknowledgments**

334 The authors wish to extend their gratitude to the staff of Jane's Place, MQI who are helping  
335 to recruit participants.

## 336 **Competing interests**

337 The authors have no competing interests to declare in connection with this article.

## 338 **Data availability**

339 There are no underlying data associated with this protocol. Data from this study will be  
340 available in open access form.

## 341 **References**

- 342 1. Nations U. Global Issues: Our growing population2023. Available from:  
343 <https://www.un.org/en/global-issues/population>.
- 344 2. Morley JE, Vellas B, van Kan GA, Anker SD, Bauer JM, Bernabei R et al Frailty consensus: a call to  
345 action. *J Am Med Dir Assoc*, 2013. (6): p. 392-7. doi: 10.1016/j.jamda.2013.03.022.
- 346 3. Turner G and Clegg A. Best practice guidelines for the management of frailty: a British Geriatrics  
347 Society, Age UK and Royal College of General Practitioners report. *Age Ageing*. 2014;43(6):744-7. doi:  
348 10.1093/ageing/afu138.
- 349 4. Travers J, Romero-Ortuno R, Bailey J & Cooney MT. Delaying and reversing frailty: a systematic  
350 review of primary care interventions. *Br J Gen Pract*, 2019. 69(678): p. e61-e69. doi:  
351 10.3399/bjgp18X700241.
- 352 5. Travers J, Romero-Ortuno R, Langan J, MacNamara F, McCormack D, McDermott C, et al. Building  
353 resilience and reversing frailty: a randomised controlled trial of a primary care intervention for older  
354 adults. *Age Ageing*, 2023. 52(2). doi: 10.1093.

- 355 6. Rockwood K, Song X, MacKnight C, Bergman H, Hogan DB, McDowell I et al. A global clinical measure  
356 of fitness and frailty in elderly people. *Cmaj*, 2005. 173(5): p. 489-95. doi: 10.1503/cmaj.050051.
- 357 7. Romero-Ortuno R and O'Shea D. Fitness and Frailty: opposite ends of a challenging continuum! Will  
358 the end of age discrimination make frailty assessments an imperative? *Ae Ageing*, 2013. 42(3) p. 279-  
359 80. 10.1093/ageing/afs189.
- 360 8. Loecker C, Schmaderer M, Zimmerman L. Frailty in Young and Middle-Aged Adults: An Integrative  
361 Review. *J Frailty Aging*. 2021;10(4):327-33. doi: 10.14283/jfa.2021.14.
- 362 9. Spiers GF, Kunonga TP, Hall A, Beyer F, Boulton E, Parker S, et al. Measuring frailty in younger  
363 populations: a rapid review of evidence. *BMJ Open*. 2021;11(3):e047051. doi: 10.1136/bmjopen-  
364 2020-047051.
- 365 10. Hanlon P, Nicholl BI, Jani BD, Lee D, McQueenie R, Mair FS. Frailty and pre-frailty in middle-aged and  
366 older adults and its association with multimorbidity and mortality: a prospective analysis of 493 737  
367 UK Biobank participants. *Lancet Public Health*. 2018;3(7):e323-e32. doi: 10.1016/S2468-  
368 2667(18)30091-4
- 369 11. Aldridge RW, Story A, Hwang SW, Nordentoft M, Luchenski SA, Hartwell G, et al. Morbidity and  
370 mortality in homeless individuals, prisoners, sex workers, and individuals with substance use disorders  
371 in high-income countries: a systematic review and meta-analysis. *Lancet*. 2018;391(10117):241-50.  
372 doi: 10.1016/S0140-6736(17)31869-X.
- 373 12. Broderick J, Kiernan S, Murphy N, Dowds J, C NC. Feasibility of a Broad Test Battery to Assess Physical  
374 Functioning Limitations of People Experiencing Homelessness. *Int J Environ Res Public Health*.  
375 2021;18(3). doi: 10.3390/ijerph18031035.
- 376 13. Kiernan S, C NC, Murphy N, Dowds J, Broderick J. Markedly poor physical functioning status of people  
377 experiencing homelessness admitted to an acute hospital setting. *Sci Rep*. 2021;11(1):9911. doi:  
378 10.1038/s41598-021-88590-0.
- 379 14. Tembo MC, Holloway-Kew KL, Sui SX, Dunning T, Low ACH, Yong SJ, et al. Prevalence of Frailty in Older  
380 Men and Women: Cross-Sectional Data from the Geelong Osteoporosis Study. *Calcif Tissue Int*.  
381 2020;107(3):220-9. doi: 10.1007/s00223-020-00713-3.
- 382 15. Zhang Q, Guo H, Gu H, Zhao X. Gender-associated factors for frailty and their impact on  
383 hospitalization and mortality among community-dwelling older adults: a cross-sectional population-  
384 based study. *PeerJ*. 2018;6:e4326. doi: 10.7717/peerj.4326.
- 385 16. Kennedy F, Romero-Ortuno R, Ní Cheallaigh C, Doyle S and Broderick, J. "It's like a free drug"-Low  
386 Threshold Exercise and Nutritional Programmes for People with Severe and Multiple Disadvantage  
387 Accessing Services for Addiction Challenges and Homelessness. *Pathways from Homelessness*.  
388 International Conference of the Faculty for Homeless and Inclusion Helath; 2023 March 16-17, 2023;  
389 London.
- 390 17. Kennedy, F., Ní Cheallaigh, C., Romero-Ortuno, R., Doyle, S. and Broderick, J. Outcomes of the LEAP  
391 feasibility trial-a low threshold exercise programme with protein supplementation to target frailty and  
392 poor physical functioning in people experiencing homelessness and addiction issues. *PLOS ONE (in*  
393 *press)*
- 394 18. Addiction EMCfDaD. Health and Social responses to drug problems: A European Guide2022. Available  
395 from: [https://www.emcdda.europa.eu/publications/mini-guides/homelessness-and-drugs-health-](https://www.emcdda.europa.eu/publications/mini-guides/homelessness-and-drugs-health-and-social-responses_en)  
396 [and-social-responses\\_en](https://www.emcdda.europa.eu/publications/mini-guides/homelessness-and-drugs-health-and-social-responses_en).
- 397 19. C NC, Cullivan S, Sears J, Lawlee AM, Browne J, Kieran J, et al. Usage of unscheduled hospital care by  
398 homeless individuals in Dublin, Ireland: a cross-sectional study. *BMJ Open*. 2017;7(11):e016420. doi:  
399 10.1136/bmjopen-2017-016420.
- 400 20. FEANTSA EFoNOWwtHFEWah. 2019-2021. Available from:  
401 <https://www.feantsa.org/en/project/2019/01/03/women-and-homelessness>.
- 402 21. The Department of Housing, Planning and Local Government (Feb 2018) Homelessness Report. 2018.  
403 Available from: <https://www.gov.ie/en/publication/793bc-homeless-report-february->

- 404 2018/?referrer=http://www.housing.gov.ie/sites/default/files/publications/files/homelessness\_repor  
405 t\_-\_february\_2018\_0.pdf
- 406 22. Mutatayi C MS, Robles Soto N, Palsdottir K & Vale Pires C. Implementing a Gender Approach in Drug  
407 Policies: Prevention, Treatment and Criminal Justice. A handbook for practitioners and decision  
408 makers. Council of Europe:Strasbourg.2022. Available from:  
409 <https://www.drugsandalcohol.ie/36974/>
- 410 23. Milani K, Ramage, K., Yang Fang, X. and Louis, M. Understanding Mothers experiencing homelessness:  
411 A gendered approach to finding solutions for family homelessness. 2016. Available from:  
412 [https://www.homelesshub.ca/sites/default/files/attachments/Family\\_Homelessness\\_Report.pdf](https://www.homelesshub.ca/sites/default/files/attachments/Family_Homelessness_Report.pdf)
- 413 24. Morton SG, B. and McLoughlin, E. . "You can't fix this in six months": The intersectionality of women's  
414 substance use in the Irish context. . In: Ireland UCDA MQ, editor. 2023. Available from:  
415 <https://www.drugsandalcohol.ie/38492/>
- 416 25. European Commission, Directorate-General for Research and Innovation, Gender in EU-funded  
417 research – Toolkit, Publications Office, 2014, <https://data.europa.eu/doi/10.2777/74150>
- 418 26. Kennedy F, Ní Cheallaigh, C., Romero-Ortuno et al. A study to explore the role of a low  
419 threshold, fitness focussed physical rehabilitation intervention with protein supplementation  
420 to target physical function and frailty in people with problematic substance use and  
421 homelessness: protocol for a single-arm feasibility cohort study. HRB Open Research.  
422 2023;6.doi.org/10.12688/hrbopenres.13678.1
- 423 27. Leong DP, Teo KK, Rangarajan S, Lopez-Jaramillo P, Avezum A, Jr., Orlandini A, et al.  
424 Prognostic value of grip strength: findings from the Prospective Urban Rural Epidemiology (PURE)  
425 study. *Lancet*. 2015;386(9990):266-73. doi: 10.1016/S0140-6736(14)62000-6.
- 426 28. Roberts HC, Denison HJ, Martin HJ, Patel HP, Syddall H, Cooper C, et al. A review of the measurement  
427 of grip strength in clinical and epidemiological studies: towards a standardised approach. *Age Ageing*.  
428 2011;40(4):423-9. doi: 10.1093/ageing/afr051.
- 429 29. Lein DH, Jr., Alotaibi M, Almutairi M, Singh H. Normative Reference Values and Validity for the 30-  
430 Second Chair-Stand Test in Healthy Young Adults. *Int J Sports Phys Ther*. 2022;17(5):907-14.
- 431 30. Brooks D, Davis AM, Naglie G. The feasibility of six-minute and two-minute walk tests in in-patient  
432 geriatric rehabilitation. *Can J Aging*. 2007;26(2):159-62. doi: 10.3138/cja.26.2.009.
- 433 31. Bohannon RW. Comfortable and maximum walking speed of adults aged 20-79 years: reference  
434 values and determinants. *Age Ageing*. 1997;26(1):15-9. doi: 10.1093/ageing/26.1.15.
- 435 32. Springer BA, Marin R, Cyhan T, Roberts H, Gill NW. Normative values for the unipedal stance test with  
436 eyes open and closed. *J Geriatr Phys Ther*. 2007;30(1):8-15. doi: 10.1519/00139143-200704000-  
437 00003. doi: 10.1519/00139143-200704000-00003.
- 438 33. Romero-Ortuno R, Walsh CD, Lawlor BA & Kenny RA. A frailty instrument for primary care: findings  
439 from the Survey of Health, Ageing and Retirement in Europe (SHARE). *BMC Geriatr*, 2010.10: p. 57.  
440 doi: 10.1186/1471-2318-10-57.
- 441 34. Hawker GA, Mian S, Kendzerska T, French M. Measures of adult pain: Visual Analog Scale for Pain  
442 (VAS Pain), Numeric Rating Scale for Pain (NRS Pain), McGill Pain Questionnaire (MPQ), Short-Form  
443 McGill Pain Questionnaire (SF-MPQ), Chronic Pain Grade Scale (CPGS), Short Form-36 Bodily Pain  
444 Scale (SF-36 BPS), and Measure of Intermittent and Constant Osteoarthritis Pain (ICOAP). *Arthritis  
445 Care Res (Hoboken)*. 2011;63 Suppl 11:S240-52. doi: 10.1002/acr.20543.
- 446 35. Ware J, Jr., Kosinski M, Keller SD. A 12-Item Short-Form Health Survey: construction of scales and  
447 preliminary tests of reliability and validity. *Med Care*. 1996;34(3):220-33. doi: 10.1097/00005650-  
448 199603000-00003.
- 449 36. Guigoz Y, Vellas B, Garry PJ. Assessing the nutritional status of the elderly: The Mini Nutritional  
450 Assessment as part of the geriatric evaluation. *Nutr Rev*. 1996;54(1 Pt 2):S59-65. doi: 10.1111/j.1753-  
451 4887.1996.tb03793.x.

- 452 37. Kaiser MJ, Bauer JM, Ramsch C, Uter W, Guigoz Y, Cederholm T, et al. Validation of the Mini  
453 Nutritional Assessment short-form (MNA-SF): a practical tool for identification of nutritional status. *J*  
454 *Nutr Health Aging*. 2009;13(9):782-8. doi: 10.1007/s12603-009-0214-7.
- 455 38. Steiber N. Strong or Weak Handgrip? Normative Reference Values for the German Population across  
456 the Life Course Stratified by Sex, Age, and Body Height. *PLoS One*. 2016;11(10):e0163917.
- 457 39. Rolland Y, Lauwers-Cances V, Cournot M, Nourhashémi F, Reynish W, Rivière D, et al. Sarcopenia, calf  
458 circumference, and physical function of elderly women: a cross-sectional study. *J Am Geriatr Soc*.  
459 2003;51(8):1120-4. doi: 10.1046/j.1532-5415.2003.51362.x.
- 460 40. Gonzalez MC, Mehrnezhad A, Razaviarab N, Barbosa-Silva TG, Heymsfield SB. Calf circumference:  
461 cutoff values from the NHANES 1999-2006. *Am J Clin Nutr*. 2021;113(6):1679-87. doi:  
462 10.1093/ajcn/nqab029.
- 463 41. Cano NJ, Miolane-Debout M, Léger J, Heng AE. Assessment of body protein: energy status in chronic  
464 kidney disease. *Semin Nephrol*. 2009;29(1):59-66. doi: 10.1016/j.semnephrol.2008.10.008.
- 465 42. Chen B, Mitchell A, Tran D. "Step up for foot care": addressing podiatric care needs in a sample  
466 homeless population. *J Am Podiatr Med Assoc*. 2014;104(3):269-76.  
467 doi: 10.1371/journal.pone.0167463
- 468 43. Tang AM, Chung M, Dong KR, Bahwere P, Bose K, Chakraborty R, et al. Determining a global mid-  
469 upper arm circumference cut-off to assess underweight in adults (men and non-pregnant women).  
470 *Public Health Nutr*. 2020;23(17):3104-13. doi: 10.1017/S1368980020000397.
- 471 44. Borg GA. Psychophysical bases of perceived exertion. *Med Sci Sports Exerc*. 1982;14(5):377-81.
- 472 45. Rosenthal M. Qualitative research methods: Why, when, and how to conduct interviews and focus  
473 groups in pharmacy research. *Currents in Pharmacy Teaching and Learning*. 2016;8(4):509-16.  
474 <https://doi.org/10.1016/j.cptl.2016.03.021>.
- 475 46. Althubaiti A. Sample size determination: A practical guide for health researchers. *J Gen Fam Med*.  
476 2023;24(2):72-78. doi: 10.1002/jgf2.600.
- 477 47. Lancaster GA, Dodd S, Williamson PR. Design and analysis of pilot studies: recommendations for good  
478 practice. *J Eval Clin Practice* 2004;10:307-312. doi: 10.1111/j..2002.384.doc.x.
- 479 48. Braun V, Clarke V. What can "thematic analysis" offer health and wellbeing researchers? *Int J Qual*  
480 *Stud Health Well-being*. 2014;9:26152. doi:10.3402/qhw.v9.26152.
- 481 49. Rogans-Watson RS, C. Lewer, D. Armstrong, M and Hudson B. Premature frailty, geriatric conditions  
482 and multimorbidity among people experiencing homelessness: a cross-sectional study in a London  
483 hostel. *Housing Care and Support*.2020.23:77-91. DOI: 10.1108/HCS-05-2020-0007.
- 484
- 485

## 486 **Supporting information**

487 S1 Fig. Exit Interview Schedule
